# Supplementary material for: Coverage and Timeliness of Birth Dose Vaccination in Sub-Saharan Africa: A Systematic Review and Meta-Analysis
Source: MDPI journal article supplement (doi:10.3390/vaccines8020301), 2020-06-11
Supplement: s1 [file s1]

# Coverage and timeliness of birth dose vaccination in sub-Saharan Africa: a systematic review and meta-analysis

## Supplementary Material

### Contents

|                                                                  |   |
|------------------------------------------------------------------|---|
| Supplementary Document 1. Search strategy for Pubmed .....       | 2 |
| Supplementary Document 2. Risk of bias examined .....            | 4 |
| Supplementary Document 3. Risk of bias for included studies..... | 5 |

## Supplementary Document 1. Search strategy for Pubmed

31 March 2017

### Search 1

“hepatitis B vaccines”[MeSH] OR hb vaccin\*[Text] OR “poliovirus vaccines”[MeSH] OR opv[Text] OR “tuberculosis vaccines”[MeSH] OR bcg[Text] OR Bacillus Calmette Guerin[Text]

N=44100

### Search 2

“vaccines”[MeSH] OR “immunization”[MeSH] OR “immunization programs”[MeSH] OR vaccine\*[Text] OR vaccinat\*[Text] OR immuniz\*[Text] OR immunis\*[Text]

N=414202

### Search 3

“hepatitis b”[MeSH] OR “hepatitis b virus”[MeSH] OR hepatitis b[Text] OR type b hepatitis[Text] OR hepatitis type b[Text] OR hbv[Text] OR hep b[Text] OR “poliomyelitis”[MeSH] OR “poliovirus”[MeSH] OR polio\*[Text] OR “tuberculosis”[MeSH] OR “mycobacterium tuberculosis”[MeSH] OR tuberculosis[Text] OR tb[Text]

N=363020

### Search 4

coverage[Text] OR uptake[Text] OR rate[Text] OR dropout[Text] OR compliance[Text] OR adherence[Text] OR completeness[Text] OR acceptance[Text] OR acceptability[Text] OR hesitancy[Text] OR timely[Text] OR timeliness[Text] OR delay[Text]

N=2729448

### Search 5

“Africa South of the Sahara”[MeSH] OR Africa\*[Text] OR SSA[Text] OR Angola\*[Text] OR Benin\*[Text] OR Botswana\*[Text] OR Burkina Faso\*[Text] OR Burkinabe\*[Text] OR Burundi\*[Text] OR Cameroon\*[Text] OR Cabo Verde\*[Text] OR Cape Verde\*[Text] OR Central African\*[Text] OR Chad\*[Text] OR Comoros\*[Text] OR Comoran\*[Text] OR Comorian\*[Text] OR Congo\*[Text] OR Djibouti\*[Text] OR Equatorial Guinea\*[Text] OR Eritrea\*[Text] OR Ethiopia\*[Text] OR Gabon\*[Text] OR Gambia\*[Text] OR Ghan\*[Text] OR Guinea\*[Text] OR Guinea Bissau\*[Text] OR Ivory Coast\*[Text] OR Cote

d'Ivoire\*[Text] OR Ivorian\*[Text] OR Kenya\*[Text] OR Lesotho\*[Text] OR Basotho\*[Text]  
OR Liberia\*[Text] OR Madagascar\*[Text] OR Malagasy\*[Text] OR Malawi\*[Text] OR  
Mali\*[Text] OR Mauritania\*[Text] OR Mauritius\*[Text] OR Mauritian\*[Text] OR  
Mozambi\*[Text] OR Namibia\*[Text] OR Niger\*[Text] OR Rwanda\*[Text] OR Sao Tome  
and Principe\*[Text] OR Senegal\*[Text] OR Seychell\*[Text] OR Sierra Leone\*[Text] OR  
Somali\*[Text] OR South Africa\*[Text] OR Sudan\*[Text] OR Swazi\*[Text] OR  
Tanzania\*[Text] OR Togo\*[Text] OR Uganda\*[Text] OR Zambia\*[Text] OR  
Zimbabwe\*[Text]

N=1055811

Search 6

2 AND 3

N=45404

Search 7

1 OR 6

N=62924

Search 8

7 AND 4 AND 5

N=1269

## Supplementary Document 2. Risk of bias examined

Adapted from the framework presented by Altman (Egger M, Smith GD, Altman D, eds. Systematic Reviews in Health Care: Meta-analysis in Context. Wiley-Blackwell; 2001).

| Study feature            | Qualities sought                                                                                                                        | Assessment |        |      |     |
|--------------------------|-----------------------------------------------------------------------------------------------------------------------------------------|------------|--------|------|-----|
|                          |                                                                                                                                         | Good       | Poor   | N/R  | N/A |
| 1.<br>Sample of patients | Eligibility criteria defined                                                                                                            | Good       | Poor   | N/R  | N/A |
|                          | Sample selection explained (setting, locations and periods of recruitment)                                                              | Good       | Poor   | N/R  | N/A |
|                          | Demographic socio-economic characteristics fully described (maternal age, maternal education, family's SES, rural/urban residence, etc) | Good       | Poor   | N/R  | N/A |
|                          | Representative of study population                                                                                                      | Good       | Poor   | N/R  | N/A |
|                          | Completeness (of the infants eligible for the study, how much proportion (%) were included)                                             | >80%       | 60-79% | <60% | N/R |
| 2.<br>Exposure           | Methods to collect exposure variables well defined                                                                                      | Good       | Poor   | N/R  | N/A |
|                          | Exposure assessor blinded to outcome status                                                                                             | Good       | Poor   | N/R  | N/A |
| 3.<br>Outcome            | Methods to collect outcome variables well defined                                                                                       | Good       | Poor   | N/R  | N/A |
|                          | Outcome assessor blinded to exposure status                                                                                             | Good       | Poor   | N/R  | N/A |

### Supplementary Document 3. Risk of bias for included studies

| Author     | Journal                          | Year | Sample of patients                  |                                                                                 |                                                                                                                                                |                                               |                                                                                                    | Exposure                                                  |                                                    | Outcome                                                  |                                                    |
|------------|----------------------------------|------|-------------------------------------|---------------------------------------------------------------------------------|------------------------------------------------------------------------------------------------------------------------------------------------|-----------------------------------------------|----------------------------------------------------------------------------------------------------|-----------------------------------------------------------|----------------------------------------------------|----------------------------------------------------------|----------------------------------------------------|
|            |                                  |      | <i>Eligibility criteria defined</i> | <i>Sample selection explained (setting, locations, periods of recruitments)</i> | <i>Demographic socio-economic characteristics fully described (maternal age, maternal education, family's SES, rural/urban residence, etc)</i> | <i>Representativeness of study population</i> | <i>Completeness (of the infants eligible for the study, how much proportion (%) were included)</i> | <i>Methods to collect exposure variables well defined</i> | <i>Exposure assessor blinded to outcome status</i> | <i>Methods to collect outcome variables well defined</i> | <i>Outcome assessor blinded to exposure status</i> |
| BD Schoub  | British Medical Journal          | 1991 | good                                | good                                                                            | N/A                                                                                                                                            | good                                          | N/R                                                                                                | good                                                      | N/A                                                | good                                                     | N/A                                                |
| D. Coetzee | Bulletin of the WHO              | 1993 | good                                | good                                                                            | good                                                                                                                                           | good                                          | 93.5%                                                                                              | good                                                      | N/A                                                | good                                                     | N/A                                                |
| A.Roth     | The Pediatric Infectious Disease | 2004 | good                                | good                                                                            | good                                                                                                                                           | good                                          | N/R                                                                                                | poor                                                      | N/A                                                | good                                                     | N/A                                                |

|              |                                                            |      |      |      |      |                                                    |      |      |     |      |     |
|--------------|------------------------------------------------------------|------|------|------|------|----------------------------------------------------|------|------|-----|------|-----|
|              | Journal                                                    |      |      |      |      |                                                    |      |      |     |      |     |
| P.K<br>BORUS | East<br>African<br>Medical<br>Journal                      | 2004 | poor | good | poor | poor                                               | N/R  | poor | NA  | good | NA  |
| A.Jahn       | Tropical<br>Medicine<br>and<br>Internatio<br>nal<br>Health | 2008 | good | good | good | good                                               | 100% | good | N/A | good | N/A |
| A.Sadoh      | Public<br>Health                                           | 2008 | good | good | N/R  | poor(only children<br>coming to certain<br>clinic) | N/R  | good | N/A | good | N/A |
| A. Sadoh     | Journal<br>of Health<br>Populatio<br>n and<br>Nutrition    | 2009 | good | good | N/R  | poor(only children<br>coming to clinic)            | N/R  | good | N/A | good | N/A |

|             |                                     |      |      |                          |      |      |       |      |     |      |     |
|-------------|-------------------------------------|------|------|--------------------------|------|------|-------|------|-----|------|-----|
| B. Olusanya | Health Research Policy and Systems  | 2010 | good | good                     | good | good | N/R   | good | N/A | good | N/R |
| JC Moisi    | Vaccine                             | 2010 | good | good                     | poor | good | 86.6% | good | NA  | good | NA  |
| L.Fadnes    | Vaccine                             | 2011 | good | good                     | good | good | 86.3% | good | N/A | good | N/A |
| B. Adebayo  | Vaccines and Vaccination            | 2012 | good | poor(no period recorded) | good | good | N/R   | good | N/A | good | N/A |
| J. Babirye  | PLoS ONE                            | 2012 | good | good                     | good | good | 91.2% | good | N/A | good | N/A |
| A. Sadoh    | Tanzania Journal of Health Research | 2013 | good | good                     | good | poor | N/R   | good | N/A | good | N/A |
| O. Waroux   | Internaitonal health                | 2013 | good | good                     | poor | good | N/R   | good | N/A | good | N/A |
| A. Schoeps  | Vaccine                             | 2013 | good | good                     | good | good | 77.3% | good | N/A | good | N/A |

|            |                                            |      |      |      |      |                                        |       |      |     |      |     |
|------------|--------------------------------------------|------|------|------|------|----------------------------------------|-------|------|-----|------|-----|
| Kidane     | East African Medical Journal               | 2013 | good | good | good | good                                   | N/R   | good | NA  | good | NA  |
| L. Calhoun | Tropical Medicine and Hygiene              | 2014 | good | good | good | poor(study number small?)              | N/R   | good | N/A | good | N/A |
| D. Laryea  | BMC public health                          | 2014 | good | good | poor | poor(only children attending 1 clinic) | N/R   | good | N/A | good | N/A |
| L. Gram    | Tropical Medicine and International Health | 2014 | good | good | good | good                                   | 66.3% | good | N/A | good | N/A |
| S. Thyssen | BMC public health                          | 2014 | good | good | good | good                                   | 100%  | good | N/A | good | N/A |
| A. Sadoh   | African Health Sciences                    | 2014 | good | poor | poor | poor(small population size)            | N/R   | good | N/A | good | N/A |



|               |                                    |      |      |      |      |      |       |      |     |      |     |
|---------------|------------------------------------|------|------|------|------|------|-------|------|-----|------|-----|
| Lutawama      | The Journal of Infectious Diseases | 2014 | good | good | poor | poor | 100%  | good | NA  | poor | NA  |
| Wagner Z      | Vaccine                            | 2014 | good | good | poor | poor | 100%  | good | NA  | good | NA  |
| A. Odutola    | BMC Health Services Research       | 2015 | good | good | good | good | N/R   | good | N/A | good | N/A |
| D. Gibson     | Vaccine                            | 2015 | good | good | poor | good | 63.9% | good | N/A | good | N/A |
| R. Miyahara   | Vaccine                            | 2016 | good | good | good | good | N/R   | good | N/A | good | N/A |
| C. Hoest      | Vaccine                            | 2017 | good | poor | good | good | N/R   | good | N/A | good | N/A |
| D. Gibson     | Lancet Global Health               | 2017 | good | poor | good | good | 79.3% | good | no  | good | N/A |
| M. O'Leary    | Archives of diseases in childhood  | 2017 | good | good | good | good | 96.8% | good | N/A | good | N/A |
| A. Schweitzer | Bulletin of WHO                    | 2017 | good | N/A  | N/A  | good | N/R   | poor | N/A | poor | N/A |

|           |                                        |      |      |      |      |      |     |      |     |      |     |
|-----------|----------------------------------------|------|------|------|------|------|-----|------|-----|------|-----|
| P. Zivich | Maternal<br>Child<br>Health<br>Journal | 2017 | good | poor | good | good | N/R | good | N/A | good | N/A |
|-----------|----------------------------------------|------|------|------|------|------|-----|------|-----|------|-----|
